# Supplementary material for: Bacterial succession and functional diversity during vermicomposting of the white grape marc Vitis vinifera v. Albariño
Source: PubMed Central journal article supplement (PMC6522490; doi:10.1038/s41598-019-43907-y), 2019-05-16
Supplement: 41598_2019_43907_MOESM1_ESM.pdf [file 41598_2019_43907_MOESM1_ESM.pdf]

# Bacterial succession and functional diversity during vermicomposting of the white grape marc *Vitis vinifera* v. Albariño

## Supplementary Figures

Allison R. Kolbe, Manuel Aira, María Gómez-Brandón, Marcos Pérez-Losada, and Jorge Domínguez

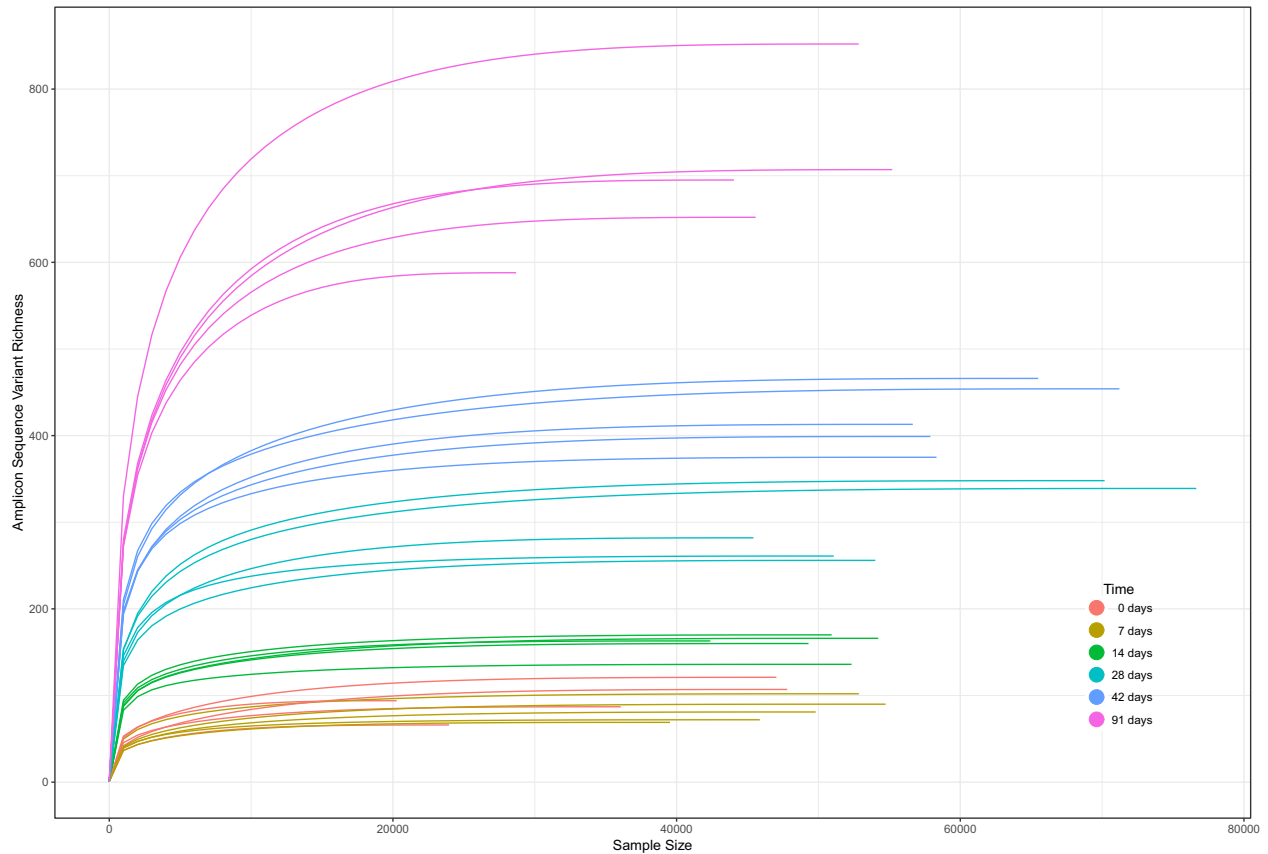

**Figure S1:** Rarefaction curves indicating the number of amplicon sequence variants (ASVs) found in each sample during vermicomposting of the white grape marc *Vitis vinifera* v. Albariño. These curves indicate that subsampling depth (20,267) was optimal for all samples.

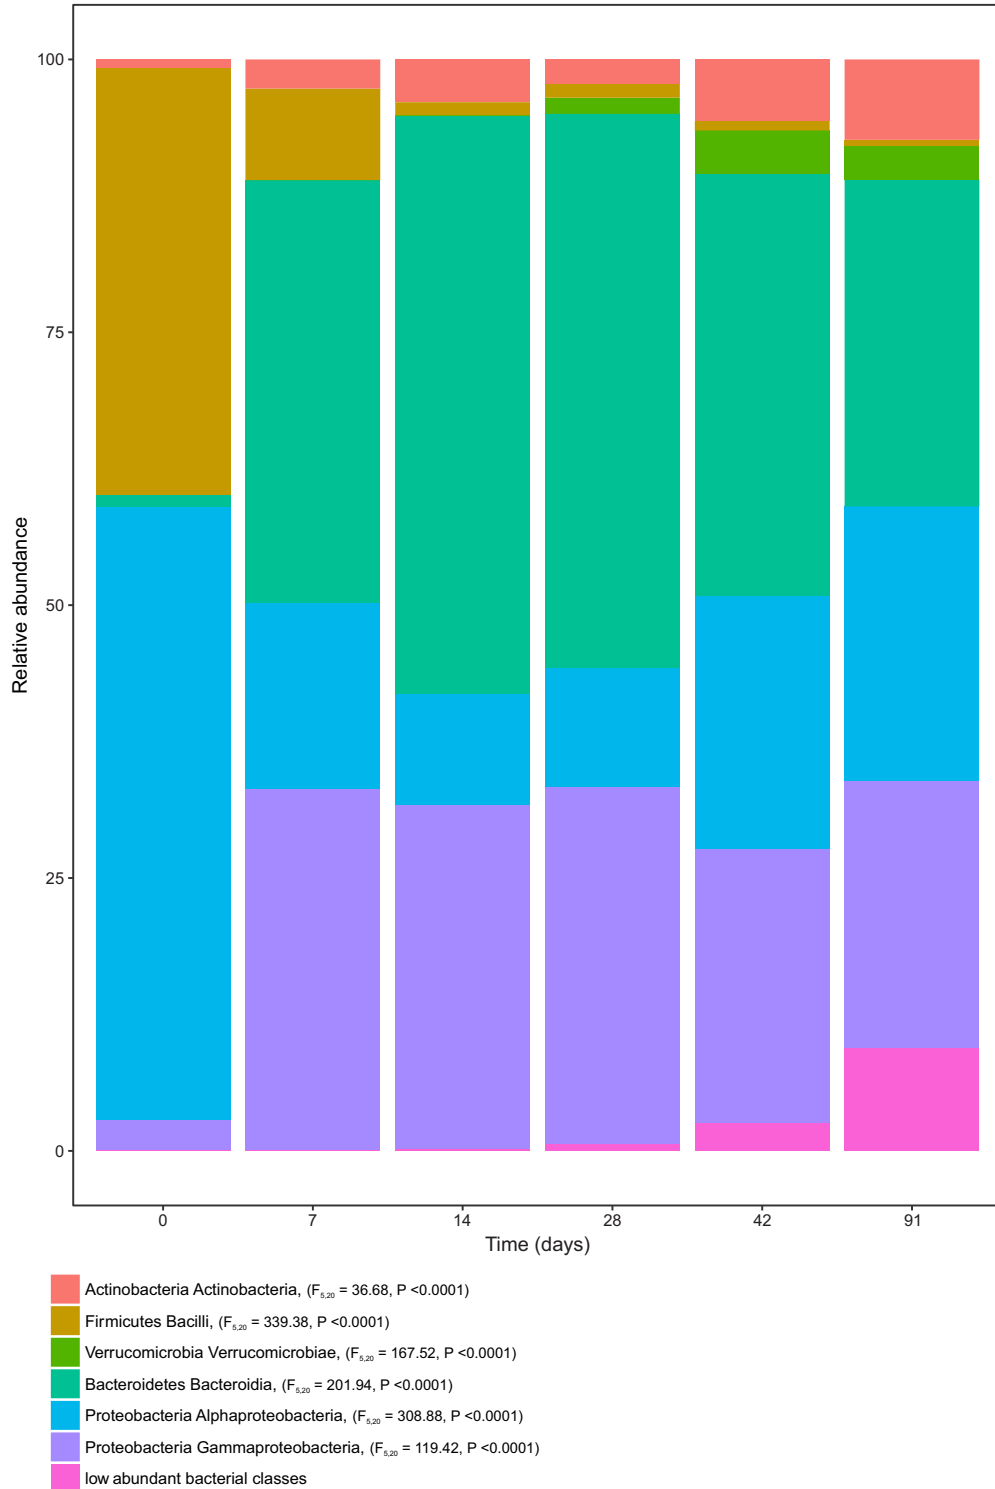

**Figure S2:** Bacterial community composition (class level) during vermicomposting of the white grape marc *Vitis vinifera* v. Albariño, presented as mean relative abundance at each time point. Low abundance bacterial classes (<1%) were grouped. Results from mixed-effects models analyses are shown, and significance was calculated using ANOVA. For each bacterial class, the relevant  $F$ -statistic ( $F_{5,20}$ ) and  $p$ -value are shown.

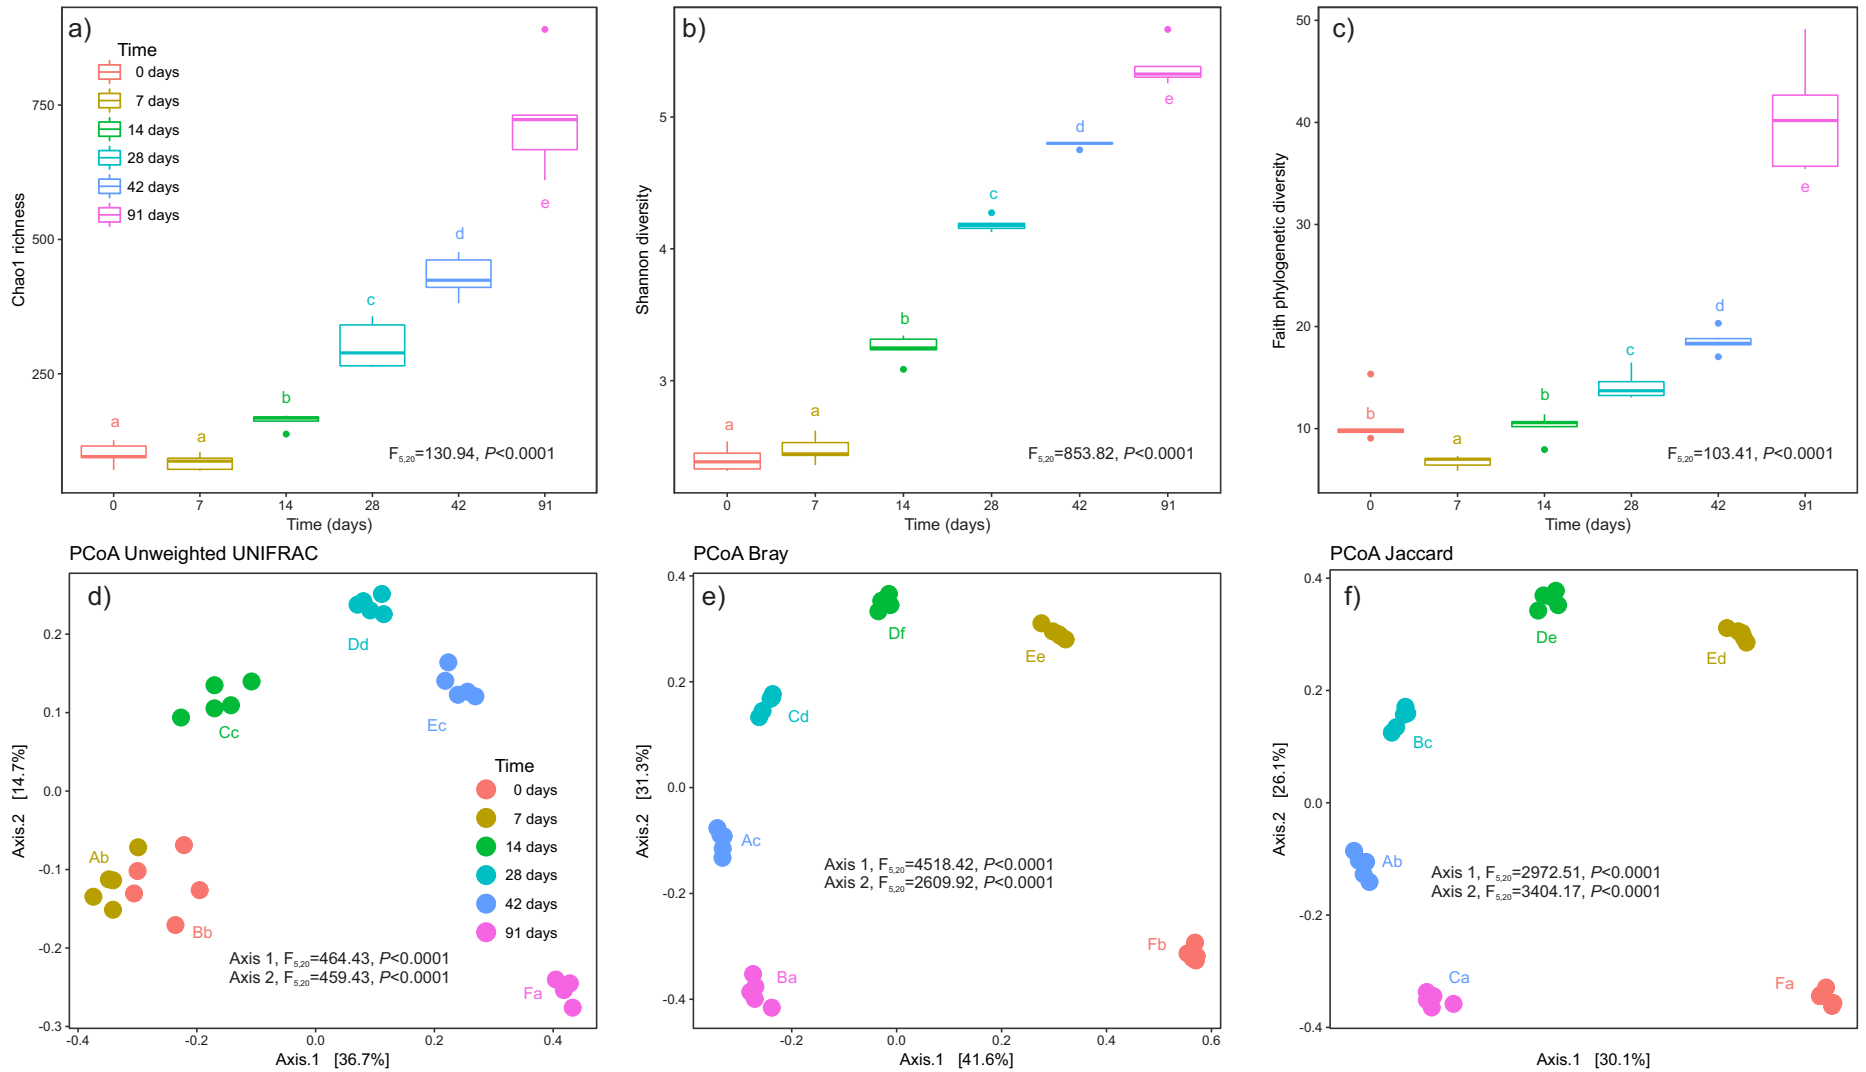

**Figure S3:** Additional estimates of bacterial  $\alpha$ -diversity and  $\beta$ -diversity during vermicomposting of the white grape marc *Vitis vinifera* v. Albariño.  $\alpha$ -diversity increased over time regardless of estimation method, including Chao1 richness (a), Shannon diversity (b), and Faith phylogenetic diversity (c). Letters in (a)-(c) denote significant differences between the different stages of the vermicomposting process (Tukey HSD test). Principle coordinate analysis with unweighted UniFrac (d), Bray-Curtis (e), and Jaccard (f) showed significant differences between stages of vermicomposting. Different capital and lowercase letters indicate significant differences between the time points in PCoA1 and PCoA2 scores, respectively.

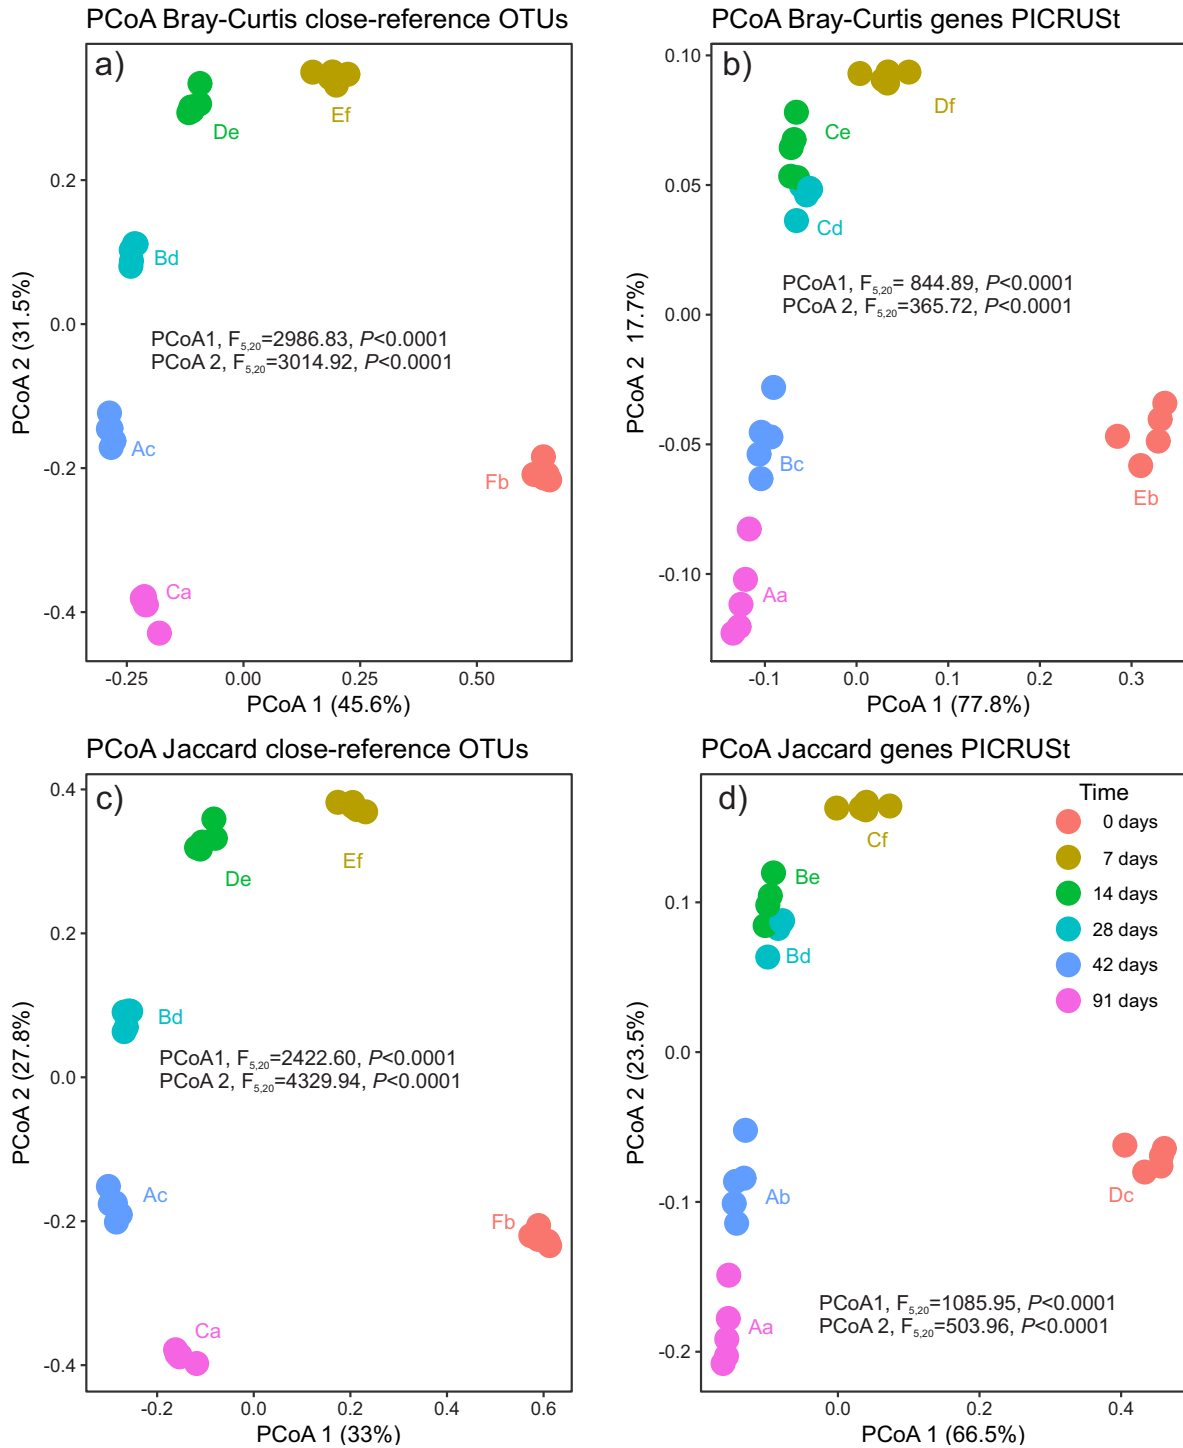

**Figure S4:** Additional estimates of  $\beta$ -diversity during vermicomposting of the white grape marc *Vitis vinifera* v. Albariño using close-reference OTUs and functional profiles. Bray-Curtis dissimilarity matrices were used in principle coordinate analysis with close-reference OTUs (a) and functional profiles generated by PICRUSt (b). Similarly, Jaccard dissimilarity matrices were used in principle coordinate analysis with close-reference OTUs (c) and functional profiles generated with PICRUSt (d). Capital and lowercase letters indicate significant differences between the time points in PCoA1 and PCoA2 scores, respectively.

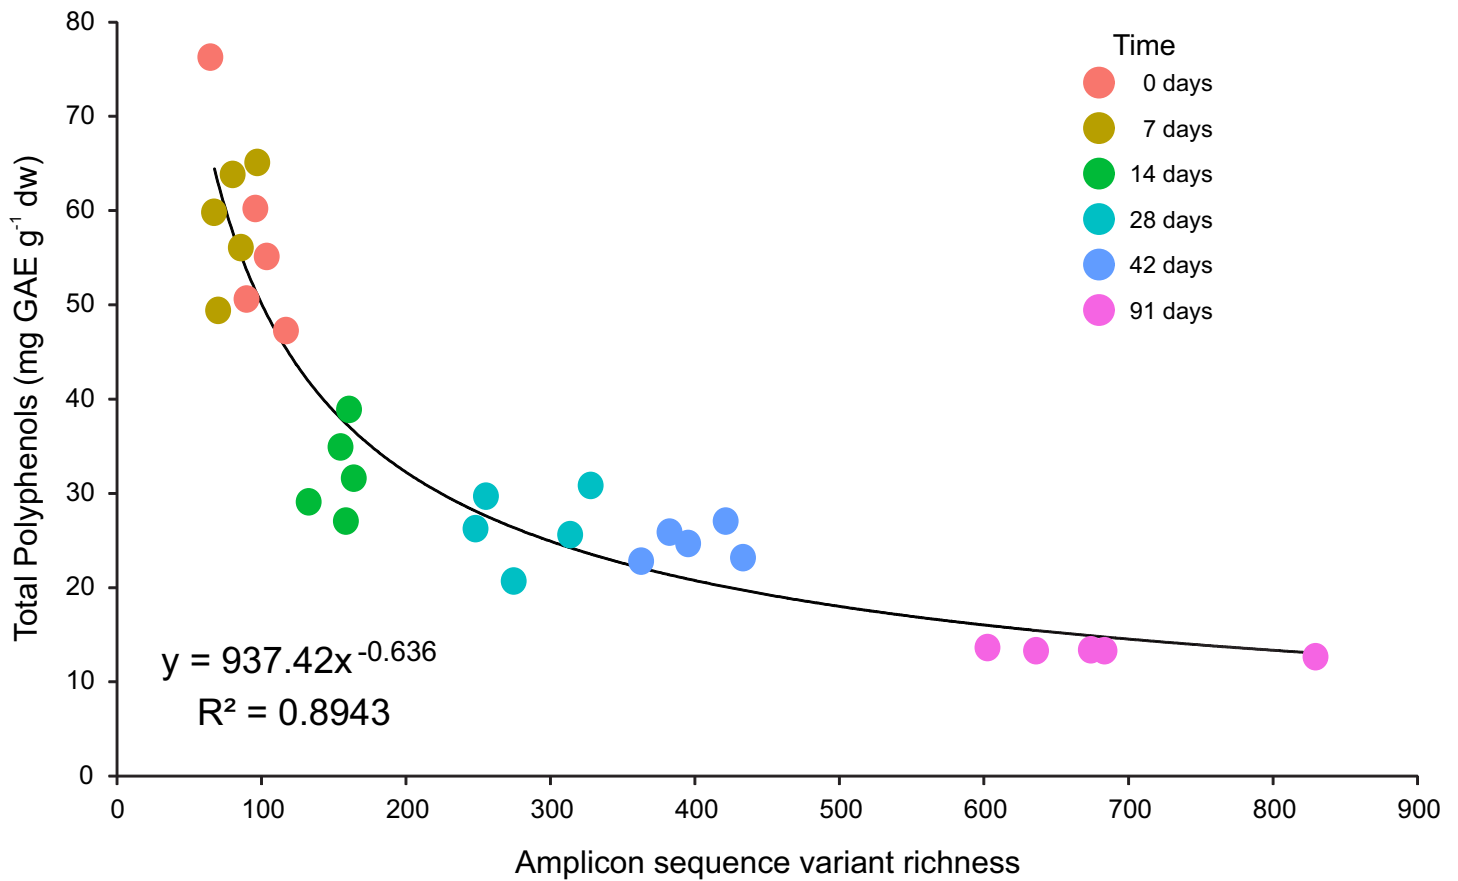

**Figure S5:** Regression analysis between the total polyphenol content and amplicon sequence variant (ASV) richness during vermicomposting of white grape marc *Vitis vinifera* v. Albariño. Polyphenol content data was previously presented in Domínguez et al., 2014 (Waste Management & Research, Vol. 32(12) 1235–1240).
